# Supplementary material
Source: Springer Nature journal article supplement (https://www.springermedizin.de/resource/supplementary/12936_2009_1167_MOESM3_ESM.pdf/9550036)
Supplement: MOESM3 [file 9550036]

### **Side 1 of the pamphlet**

This brochure has been prepared by the Institutional Review Board (IRB) of the Ifakara Health Institute (IHI). IHI has been conducting health research in Tanzania since 1957. IRB is an independent unit of IHI which reviews protocols and oversees studies conducted through IHI that involve human participants. The main objective of IHI IRB is to safeguard the welfare and dignity of the participants in research so as to ensure as much as possible that the research projects involving IHI do not harm the people involved.

**Participants should understand potential risks associated with particular research projects and the strategies put in place to avoid those risks or to minimize them. It is critical to know upfront what help will be available in the event of some risks affecting you as a participant.**

### **Side 2 of the pamphlet**

- The study participants contribute to the development of good human health for the present and future generations.
- Health research should be as safe as possible and should be done in a way that protects the welfare of the participants involved.
- Remember that your participation in health research is very important to all of us.
- You have the right to be given answers to any questions that you may have and to have enough information about the study before engaging in any study.

Important issues to remember before engaging in health research include the following:

1. Know who are involved in that particular study and their institutional affiliation(s).
2. You must understand the objective of that particular research and how it will potentially improve the health of the community ultimately.
3. Know why you have been selected to be involved in particular research project.
4. Understand your responsibilities in that research project.
5. Understand if there are any potential risks associated with the research and the potential benefits.
6. Understand the duration of the research project and the time you will spend participating in the project procedures
7. As a participant you have the right to ask any question and be given the answers to the questions at any time before, during and after the research project
8. Understand how your personal information will be protected by the researchers
